# Supplementary material for: Context-Aware Systems for Chronic Disease Patients: Scoping Review
Source: PubMed Central journal article supplement (PMC6601254; doi:10.2196/10896), 2019-06-17
Supplement: jmir_v21i6e10896_app1.pdf [file jmir_v21i6e10896_app1.pdf]

## **Supplementary Information File 1**

### **1.1 Search strategy for MEDLINE (via PubMed interface)**

URL: <https://www.ncbi.nlm.nih.gov/pubmed/>

Limits: none

Conducted in September 2016 and updated in October 2017

#1 ("Medical Informatics"[Mesh] OR "Consumer Health Information"[Mesh] OR "digital health" or "ehealth" OR "information technology" OR "information communication technology" OR "decision support system" OR "Health informatics" OR "medical informatics" OR "decision support") **AND**

#2 ("consumer work" OR "consumer activit\*" OR "consumer task\*" OR "consumer schedule\*" OR "consumer context\*" OR "consumer routine\*" OR "consumer self-management" OR "consumer self-monitor\*" OR "consumer self-care") OR ("patient work" OR "patient activit\*" OR "patient task\*" OR "patient schedule\*" OR "patient context\*" OR "patient routine\*" OR "patient self-management" OR "patient self-monitor\*" OR "patient self-care") OR ("carer work" OR "carer activit\*" OR "carer task\*" OR "carer schedule\*" OR "carer context\*" OR "carer routine\*") OR ("Caregivers" [Mesh] AND (work OR activit\* OR task\* OR schedule\* OR routine\*))

### **1.2 Search strategy for Embase**

URL: Macquarie University Library (via OVID Interface)

Limits: none

Conducted in September 2016 and updated in October 2017

#1 ("Medical Informatics"[Mesh] OR "Consumer Health Information"[Mesh] OR "digital health" or "ehealth" OR "information technology" OR "information communication technology" OR "decision support system" OR "Health informatics" OR "medical informatics" OR "decision support") **AND**

#2 ("consumer work" OR "consumer activit\*" OR "consumer task\*" OR "consumer schedule\*" OR "consumer context\*" OR "consumer routine\*" OR "consumer self-management" OR "consumer self-monitor\*" OR "consumer self-care") OR ("patient work" OR "patient activit\*" OR "patient task\*" OR "patient schedule\*" OR "patient context\*" OR "patient routine\*" OR "patient self-management" OR "patient self-monitor\*" OR "patient self-care") OR ("carer work" OR "carer activit\*" OR "carer task\*" OR "carer schedule\*" OR "carer context\*" OR "carer routine\*") OR ("Caregiver" [Mesh] AND (work OR activit\* OR task\* OR schedule\* OR routine\*))

### **1.3 Search strategy for CINAHL**

URL: Macquarie University Library (via OVID Interface)

Limits: none

Conducted in September 2016 and updated in October 2017

#1 ("Medical Informatics" OR "Consumer Health Information" OR "digital health" or "ehealth" OR "information technology" OR "information communication technology" OR "decision support system" OR "Health informatics" OR "decision support") **AND**

#2 ("consumer work" OR "consumer activit\*" OR "consumer task\*" OR "consumer schedule\*" OR "consumer context\*" OR "consumer routine\*" OR "consumer self-management" OR "consumer self-monitor\*" OR "consumer self-care" OR "patient work" OR "patient activit\*" OR

“patient task\*” OR “patient schedule\*” OR “patient context\*” OR “patient routine\*” OR “patient self-management” OR “patient self-monitor\*” OR “patient self-care” OR “carer work” OR “carer activit\*” OR “carer task\*” OR “carer schedule\*” OR “carer context\*” OR “carer routine\*” OR “caregiver work” OR “caregiver activit\*” OR “caregiver task\*” OR “caregiver schedule\*” OR “caregiver routine\*”

#### **1.4 Search strategy for ACM Digital**

URL: Macquarie University Library (via OVID Interface)

Limits: none

Conducted in September 2016 and updated in October 2017

#1 ("Medical Informatics" OR "Consumer Health Information" OR "digital health" or "ehealth" OR "information technology" OR "information communication technology" OR "decision support system" OR "Health informatics" OR "decision support") **AND**

#2 ("consumer work" OR "consumer activit\*" OR "consumer task\*" OR "consumer schedule\*" OR "consumer context\*" OR "consumer routine\*" OR "consumer self-management" OR "consumer self-monitor\*" OR "consumer self-care") OR (“patient work” OR “patient activit\*” OR “patient task\*” OR “patient schedule\*” OR “patient context\*” OR “patient routine\*” OR “patient self-management” OR “patient self-monitor\*” OR “patient self-care”) OR (“carer work” OR “carer activit\*” OR “carer task\*” OR “carer schedule\*” OR “carer context\*” OR “carer routine\*”) OR ("caregiver work” OR “caregiver activit\*” OR “caregiver task\*” OR “caregiver schedule\*” OR “caregiver routine\*”)

#### **1.5 Search strategy for Web of Science**

URL: Macquarie University Library (via OVID Interface)

Limits: none

Conducted in September 2016 and updated in October 2017

#1 ("Medical Informatics" OR "Consumer Health Information" OR "digital health" or "ehealth" OR "information technology" OR "information communication technology" OR "decision support system" OR "Health informatics" OR "decision support") **AND**

#2 ("consumer work" OR "consumer activit\*" OR "consumer task\*" OR "consumer schedule\*" OR "consumer context\*" OR "consumer routine\*" OR "consumer self-management" OR "consumer self-monitor\*" OR "consumer self-care" OR "patient work" OR "patient activit\*" OR "patient task\*" OR "patient schedule\*" OR "patient context\*" OR "patient routine\*" OR "patient self-management" OR "patient self-monitor\*" OR "patient self-care" OR "carer work" OR "carer activit\*" OR "carer task\*" OR "carer schedule\*" OR "carer context\*" OR "carer routine\*" OR "caregiver work" OR "caregiver activit\*" OR "caregiver task\*" OR "caregiver schedule\*" OR "caregiver routine\*")

#### **1.6 Search strategy for Scopus**

URL: Macquarie University Library (via OVID Interface)

Limits: none

Conducted in September 2016 and updated in October 2017

#1 ("Medical Informatics" OR "Consumer Health Information" OR "digital health" or "ehealth" OR "information technology" OR "information communication technology" OR "decision support system" OR "Health informatics" OR "decision support") **AND**

#2 ("consumer work" OR "consumer activit\*" OR "consumer task\*" OR "consumer schedule\*" OR "consumer context\*" OR "consumer routine\*" OR "consumer self-management" OR

"consumer self-monitor\*" OR "consumer self-care" OR "patient\* work" OR "patient activit\*" OR "patient task\*" OR "patient schedule\*" OR "patient context\*" OR "patient routine\*" OR "patient self-management" OR "patient self-monitor\*" OR "patient self-care" OR "carer work" OR "carer activit\*" OR "carer task\*" OR "carer schedule\*" OR "carer context\*" OR "carer routine\*" OR "caregiver work" OR "caregiver activit\*" OR "caregiver task\*" OR "caregiver schedule\*" OR "caregiver routine\*")
